# Supplementary material for: Myeloid cell-associated aromatic amino acid metabolism facilitates CNS myelin regeneration
Source: PubMed Central journal article supplement (PMC10762216; doi:10.1038/s41536-023-00345-9), 2024-01-02
Supplement: 41536_2023_345_MOESM1_ESM.pdf [file 41536_2023_345_MOESM1_ESM.pdf]

## SUPPLEMENTARY FIGURES

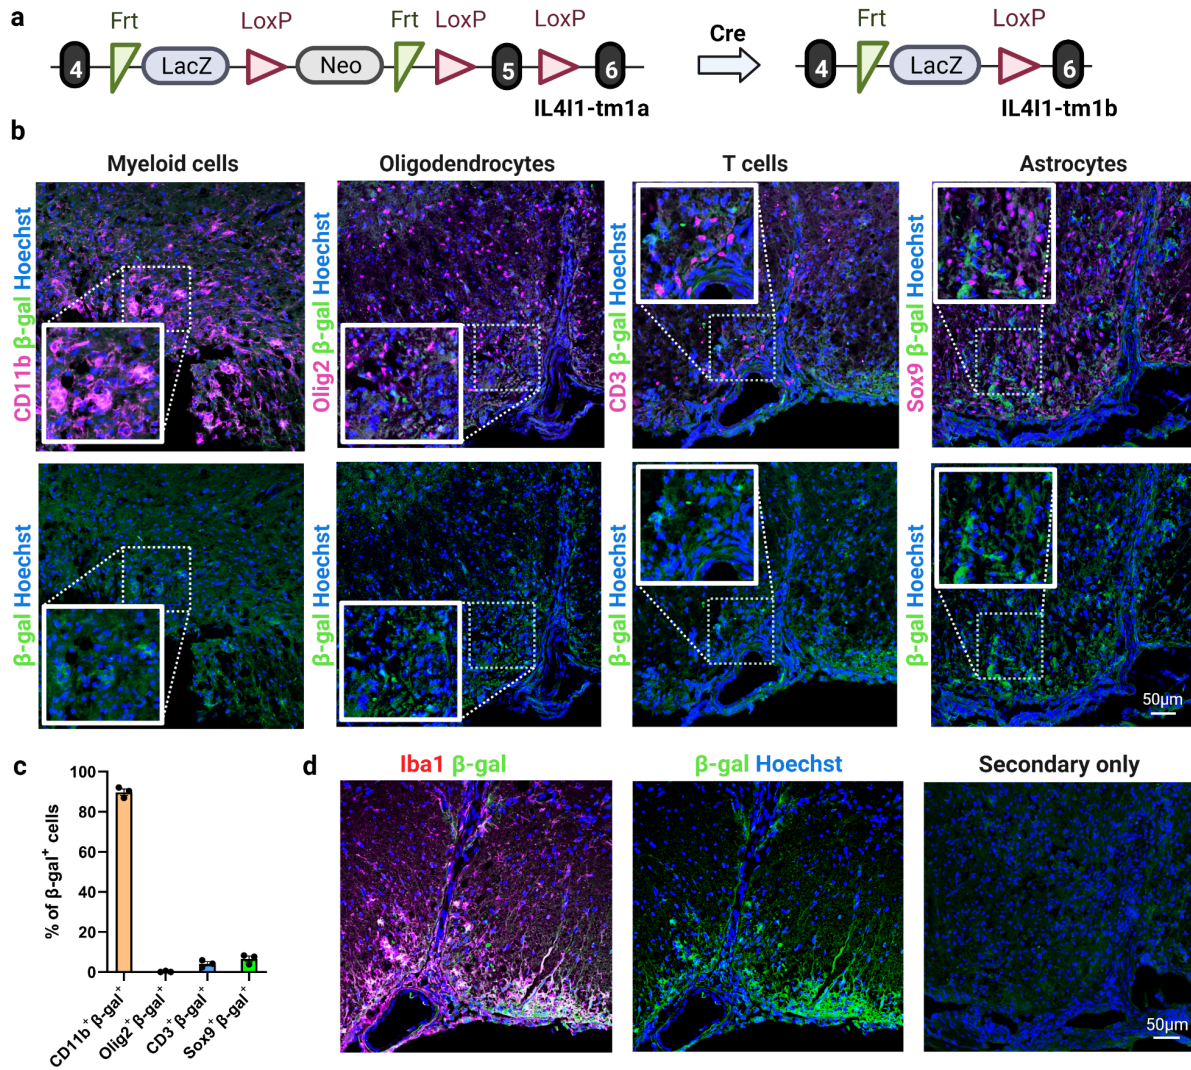

**Supplementary Figure 1. IL411 expression pattern in demyelinated lesions. a,** Schematic of generating IL411-tm1b reporter line. **b,** Representative images for immunostaining of *Il4i1*<sup>tm1b/+</sup> mouse lesions for LacZ reporter ( $\beta$ -gal), CD11b, Olig2, CD3, and Sox9. **c,** Quantification for CD11b<sup>+</sup> $\beta$ -gal<sup>+</sup> myeloid cells, Olig2<sup>+</sup> $\beta$ -gal<sup>+</sup> oligodendrocytes, CD3<sup>+</sup> $\beta$ -gal<sup>+</sup> T cells, and Sox9<sup>+</sup> $\beta$ -gal<sup>+</sup> astrocytes over all IL411-expressing ( $\beta$ -gal<sup>+</sup>) cells in lesions (n=3 mice). **d,** Representative images of

immunostaining for LacZ reporter ( $\beta$ -gal), myeloid cells marker (Iba1), and secondary-only control in *I4i1<sup>tm1b/+</sup>* mouse lesions. Bars represent the means with SEM.

The scale bar represents 50  $\mu$ m.

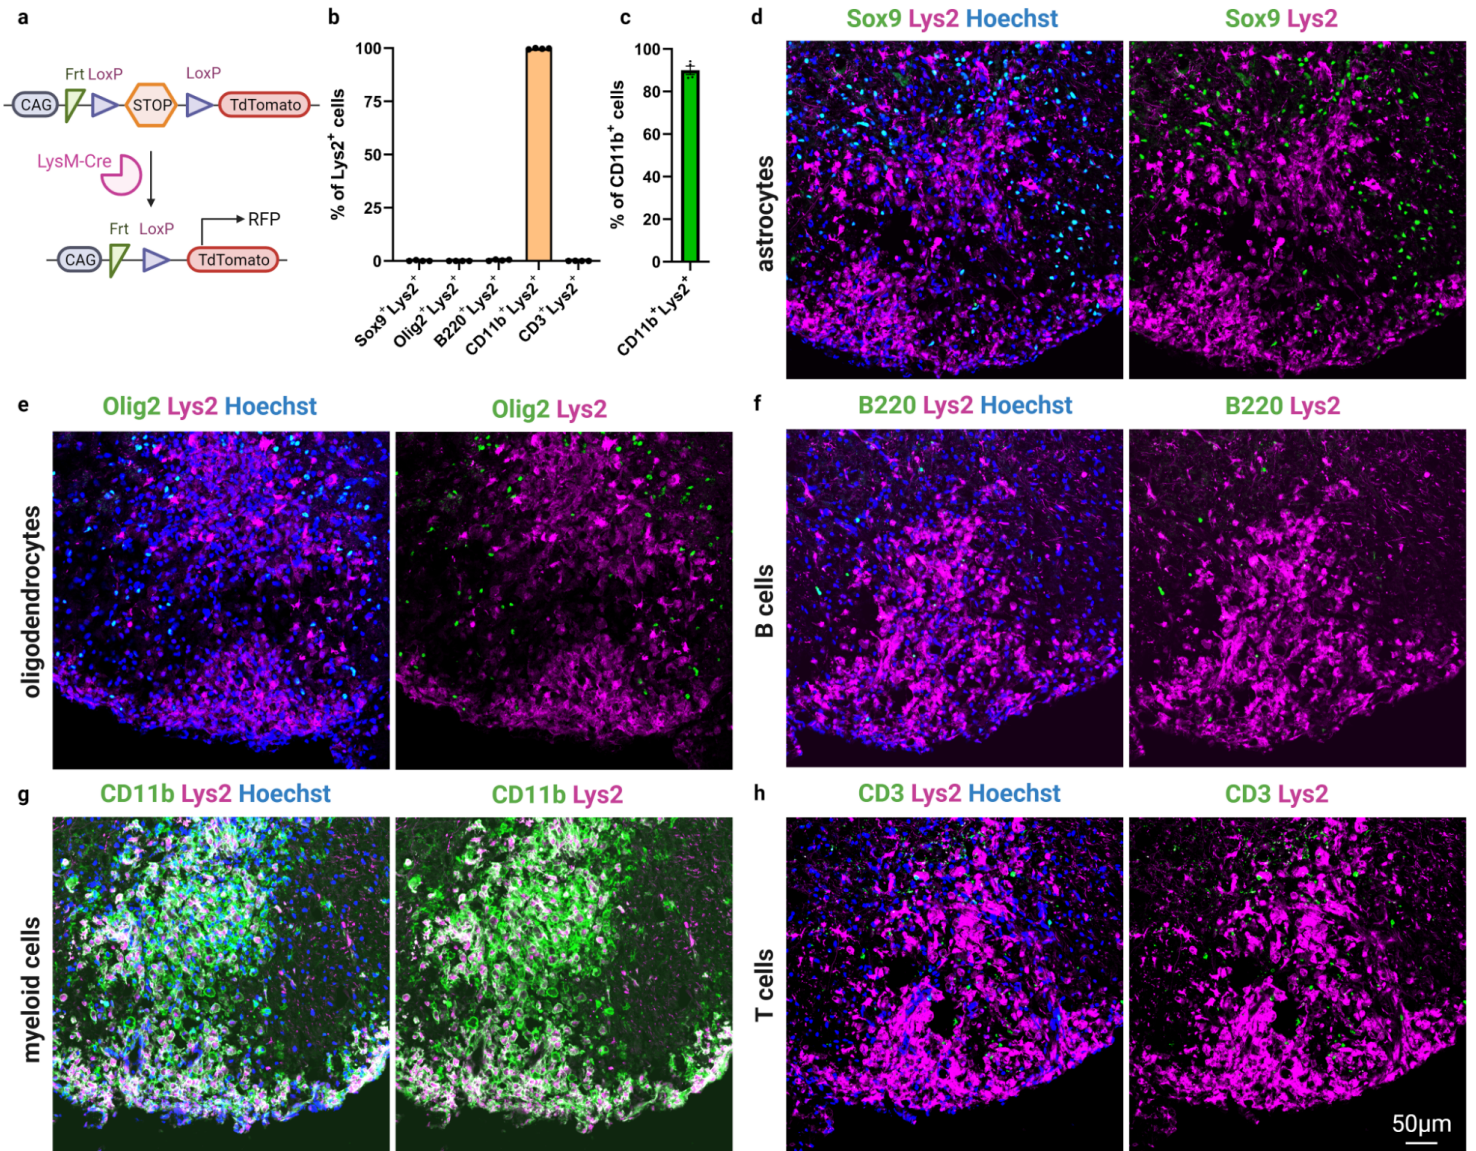



**Supplementary Figure. 2. Characterization of LysM-Cre expression.** **a**, Schematic of crossing LysM-Cre line with a ROSA reporter line, where Cre recombinase removes the stop codon and leads to the expression of endogenous red fluorescent protein (RFP). **b**, Quantification for Sox9<sup>+</sup>Lys2<sup>+</sup> astrocytes, Olig2<sup>+</sup>Lys2<sup>+</sup> oligodendrocytes, B220<sup>+</sup>Lys2<sup>+</sup> B cells, CD11b<sup>+</sup>Lys2<sup>+</sup> myeloid cells, and CD3<sup>+</sup>Lys2<sup>+</sup> T cells over all Lys2<sup>+</sup> cells in lesions (n=4 mice). Bars represent the mean with SEM. **c**, Quantification for CD11b<sup>+</sup>Lys2<sup>+</sup> cells over all CD11b<sup>+</sup> cells. **d-h**, Representative images for endogenous RFP that represents Lys2 expression, and immunostaining of Sox9, Olig2, B220, CD11b, and CD3. The scale bar = 50 μm.

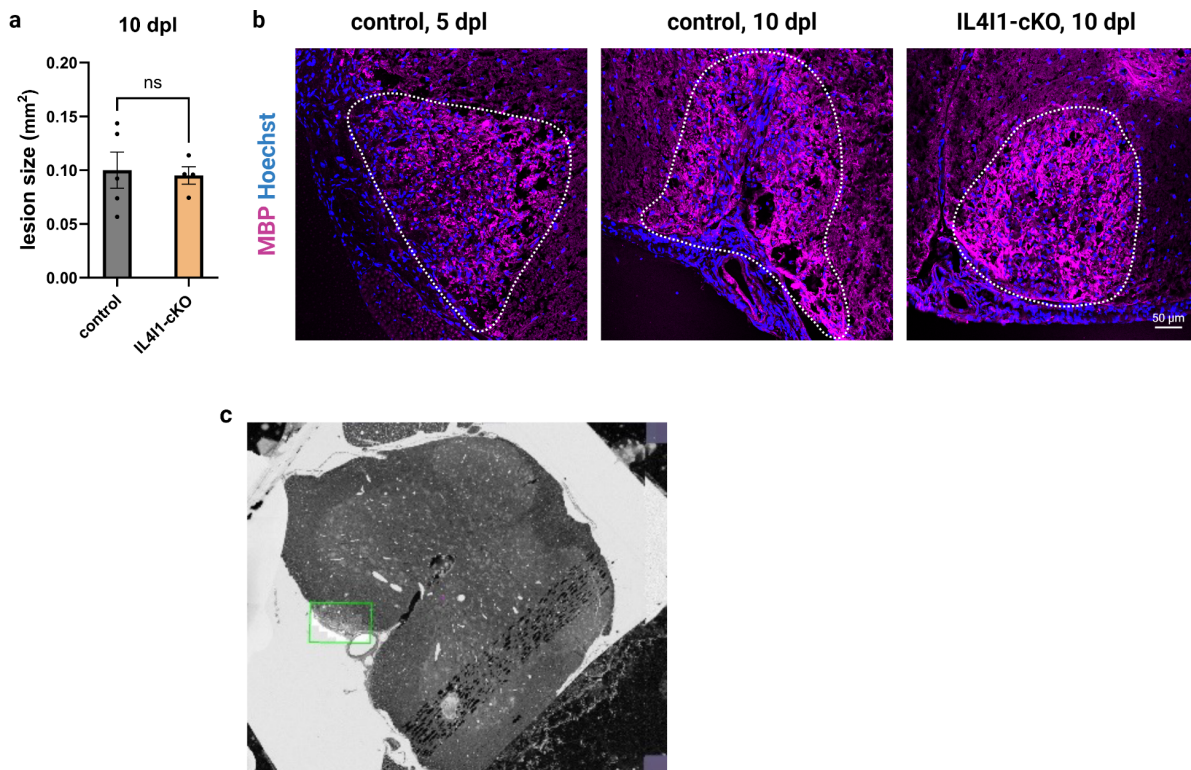

**Supplementary Figure 3. Demyelinated lesion size of IL411-cKO and control mice.**

**a**, Quantification of the demyelinated lesion sizes in IL411-cKO and control mice at 10 dpl (n=4-5 mice, unpaired t-test). **b**, Representative images of MBP immunostaining in control animals at 5 dpl, which display more punctate and disconnected staining, indicative of myelin fragments, and in control and IL411-cKO mice at 10 dpl, which display smooth and connected staining, indicative of newly generated myelin. The scale bar = 50  $\mu$ m. **c**, Representative low magnification image of a spinal cord section containing a focal lesion (green outline) under SEM. Once a lesion has been identified, the lesion is then imaged at high magnification. Bars represent the means with SEM. Each point represents an individual mouse. ns=non-significant.



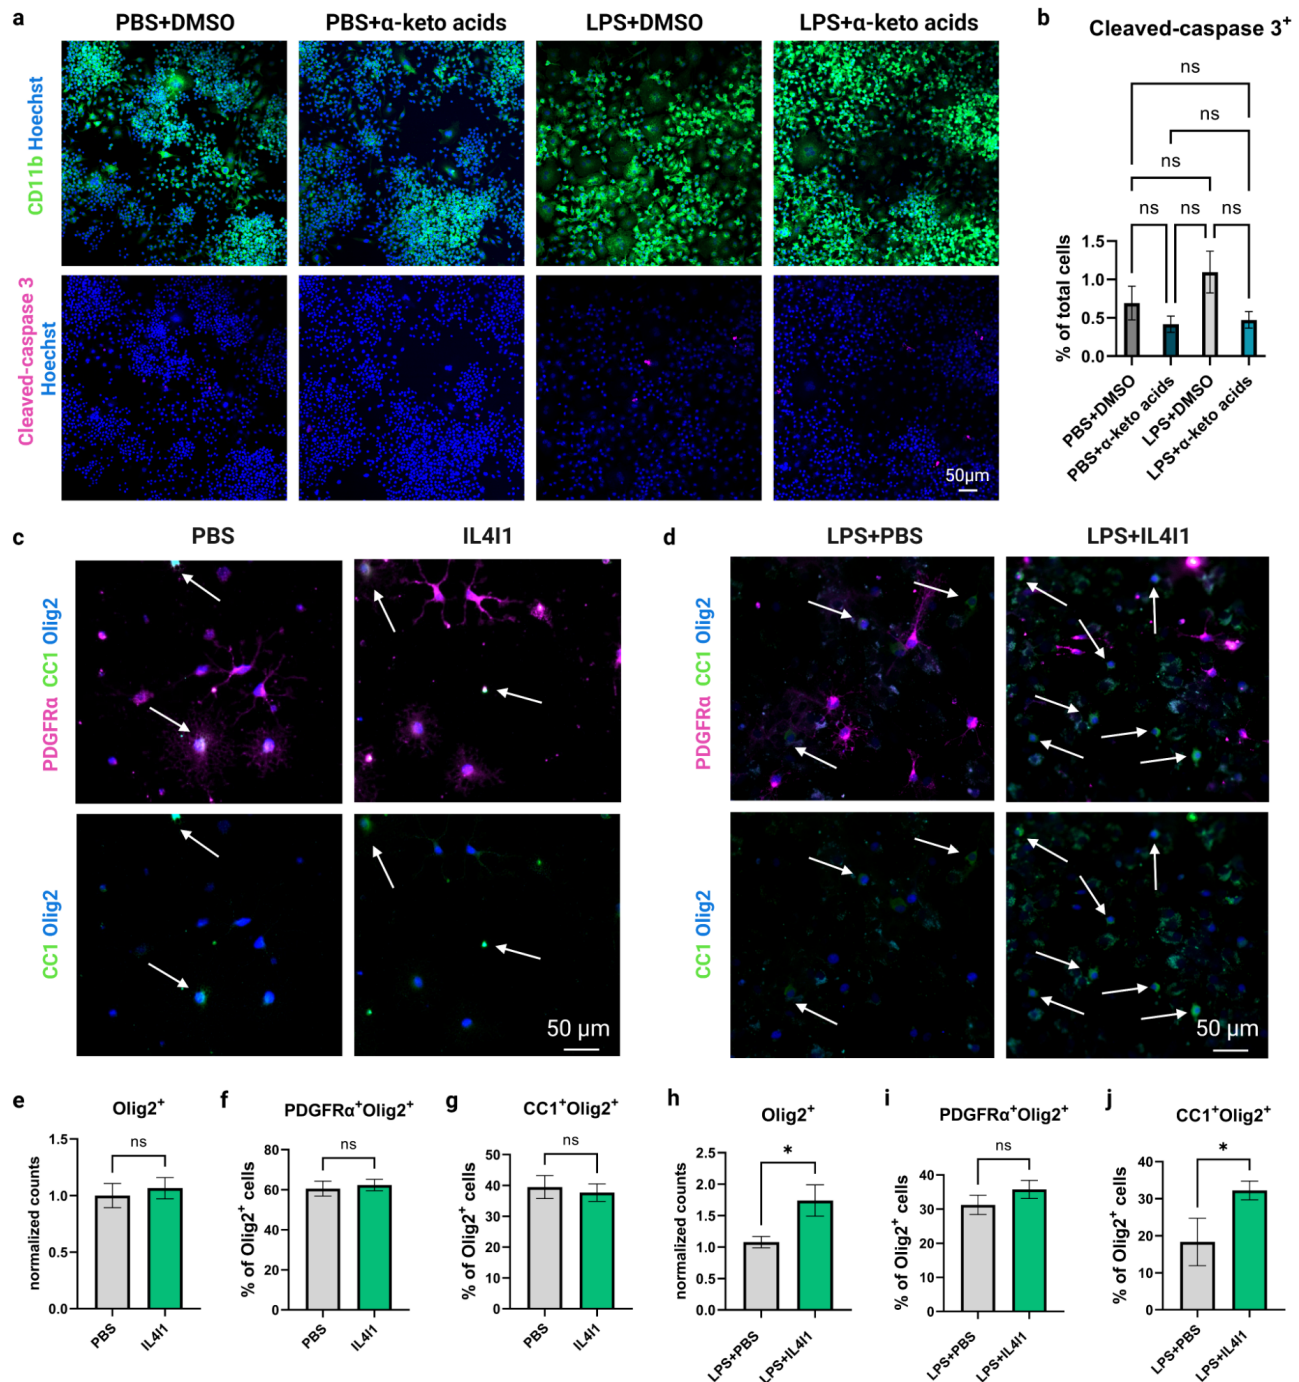

**Supplementary Figure. 4. Viability test on AKAs-treated myeloid cells, and effect of IL411 on oligodendrocyte and mixed glial cultures. a, Representative image of**

immunostaining for myeloid cells (CD11b<sup>+</sup>) and apoptosis (cleaved-caspase 3<sup>+</sup>) in RAW 264.7 cells treated with PBS+DMSO, PBS+AKAs, LPS+DMSO, and LPS+AKAs. **b**, Quantification of immunostaining for cleaved-caspase 3<sup>+</sup> cells over total cells (n=10 fields of view from two rounds of independent studies, Tukey's multiple comparisons test). **c**, Representative image of PDFGR $\alpha$ , CC1, and Olig2 staining in PBS or IL4I1-treated OPC cultures. **d**, Representative image of PDFGR $\alpha$ , CC1, and Olig2 staining in PBS or IL4I1-treated mixed glial cultures under LPS stimulation. **e-g**, Quantification of Olig2<sup>+</sup> oligodendrocyte lineage cells (e), and the percentage of Olig2<sup>+</sup>PDGFR $\alpha$ <sup>+</sup> immature oligodendrocytes (f) and Olig2<sup>+</sup>CC1<sup>+</sup> mature oligodendrocytes (g) overall oligodendrocyte lineage cells. (n=15-19 fields of view from two independent studies, unpaired t-test.) **h-j**, Quantification of Olig2<sup>+</sup> oligodendrocyte lineage cells (h), and the percentage of Olig2<sup>+</sup>PDGFR $\alpha$ <sup>+</sup> immature oligodendrocytes (i) and Olig2<sup>+</sup>CC1<sup>+</sup> mature oligodendrocytes (j) over all Olig2<sup>+</sup> cells (n=5-19 fields of view from two independent studies, unpaired t-test). Arrows pointing at CC1<sup>+</sup>Olig2<sup>+</sup> cells. The scale bar = 50  $\mu$ m. Bars represent the means with SEM. \*P < 0.05; ns=not significant.

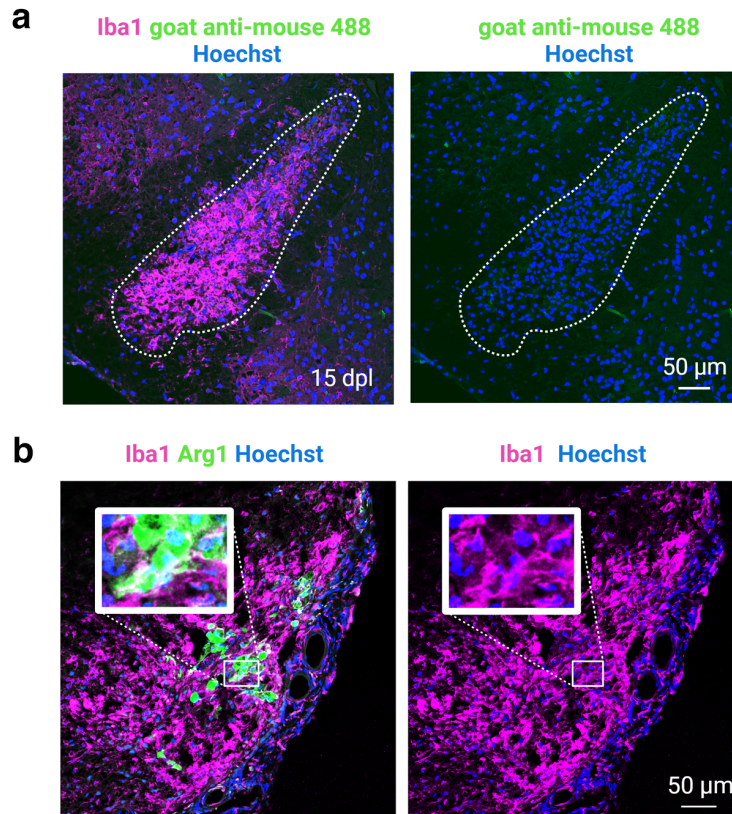

**Supplementary Figure 5. iNOS and Arg1 staining of lesions. a,** Image of secondary antibody-only control for iNOS staining. **b,** High-magnification representative image of Arg1 and Iba1 staining. The scale bar = 50  $\mu$ m.



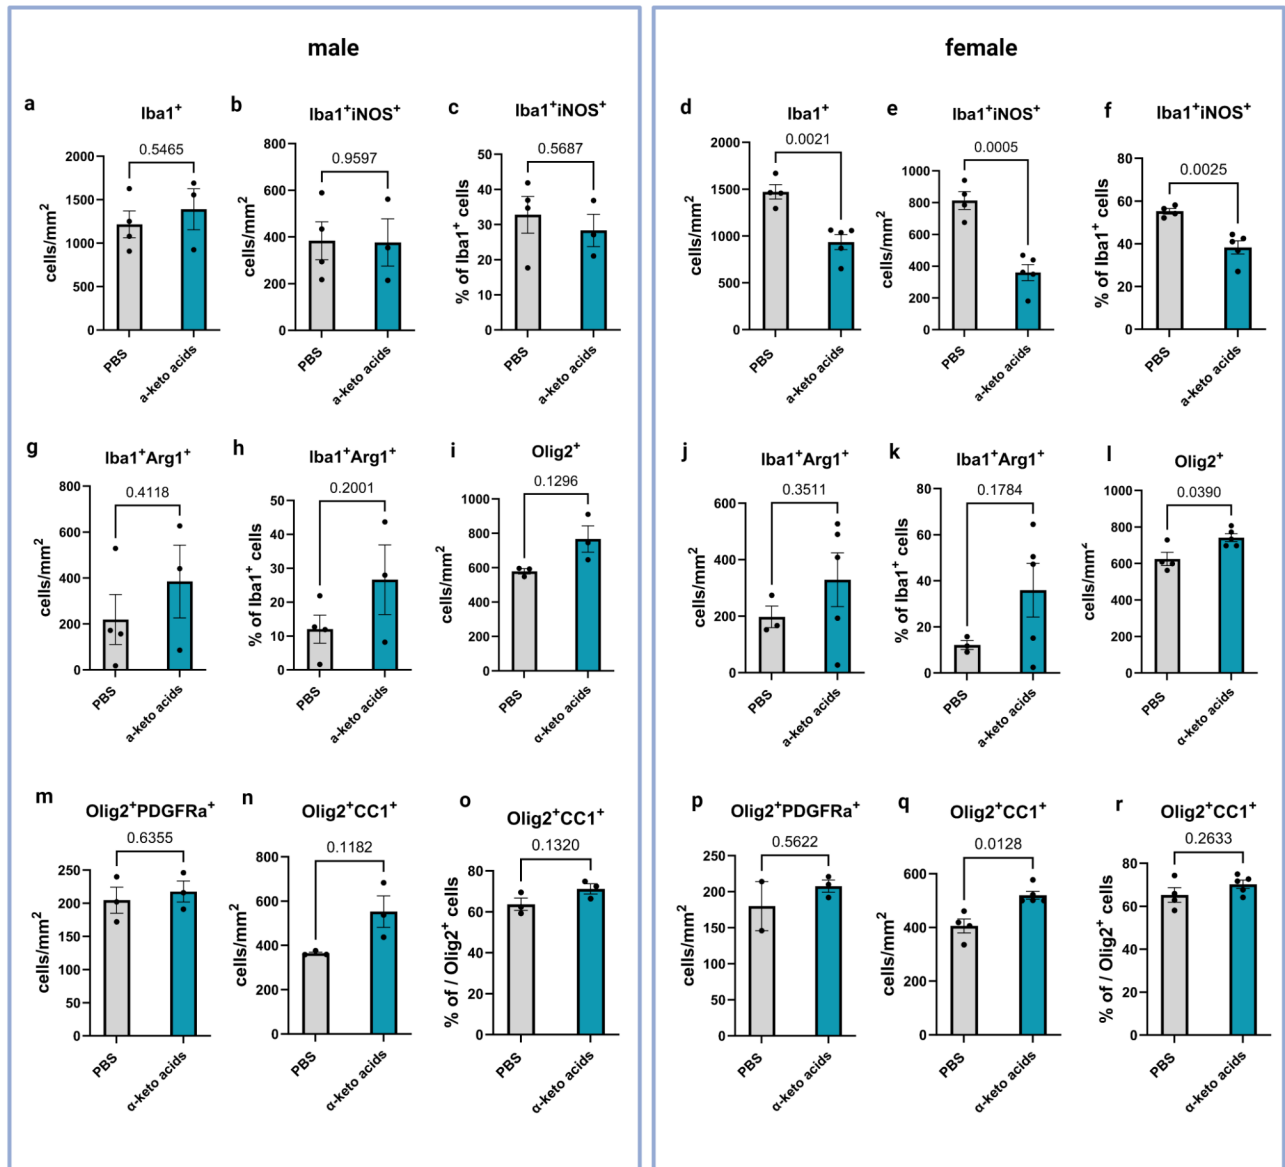

**Supplementary Figure 6. The effect of AKAs on male and female lesioned mice.**

**a-f**, Quantification of Iba1<sup>+</sup> myeloid cells and Iba1<sup>+</sup>iNOS<sup>+</sup> inflammatory myeloid cells in lesions from PBS or AKAs-treated male (n=3-4) and female mice (n=4-5, unpaired t-test). **g-l**, Quantification of Iba1<sup>+</sup>Arg1<sup>+</sup> pro-regenerative myeloid cells and Olig2<sup>+</sup> oligodendrocyte lineage cells in lesions from PBS or AKAs-treated male (n=3-4) and

female mice (n=3-5, unpaired t-test). **m-r**, Quantification of Olig2<sup>+</sup>PDGFR $\alpha$ <sup>+</sup> OPCs, and Olig2<sup>+</sup>CC1<sup>+</sup> mature oligodendrocytes in lesions from PBS or AKAs-treated male (n=3) and female mice (n=2-5 mice, unpaired t-test). Bars represent the means with SEM. Each point represents an individual value.

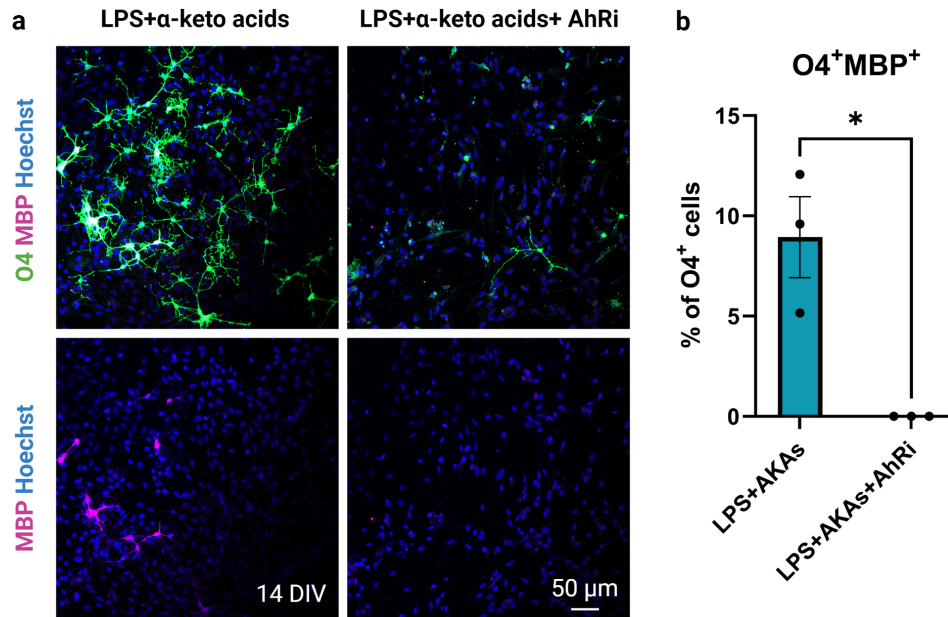

**Supplementary Figure 7. AhR inhibitor treatment of mixed glial culture. a-b,** Representative images, and quantification of O4<sup>+</sup>MBP<sup>+</sup> mature oligodendrocyte in mixed glial culture under LPS stimulation and AKAs treatment with or without AhR inhibitor (AhRi). The scale bar = 50  $\mu$ m. \*P < 0.05.
